# Supplementary material for: Determination of Colchicine in Pharmaceutical Formulations, Traditional Extracts, and Ultrasonication-Based Extracts of Colchicum autumnale Pleniflorum (L.) Using Regular and Greener HPTLC Approaches: A Comparative Evaluation of Validation Parameters
Source: Plants (Basel). 2022 Jul 3;11(13):1767. doi: 10.3390/plants11131767 (PMC9268838; doi:10.3390/plants11131767)
Supplement: Supplementary file 1 [file plants-11-01767-s001.zip › plants-1796453-supplementary.pdf]

## Supplementary Materials

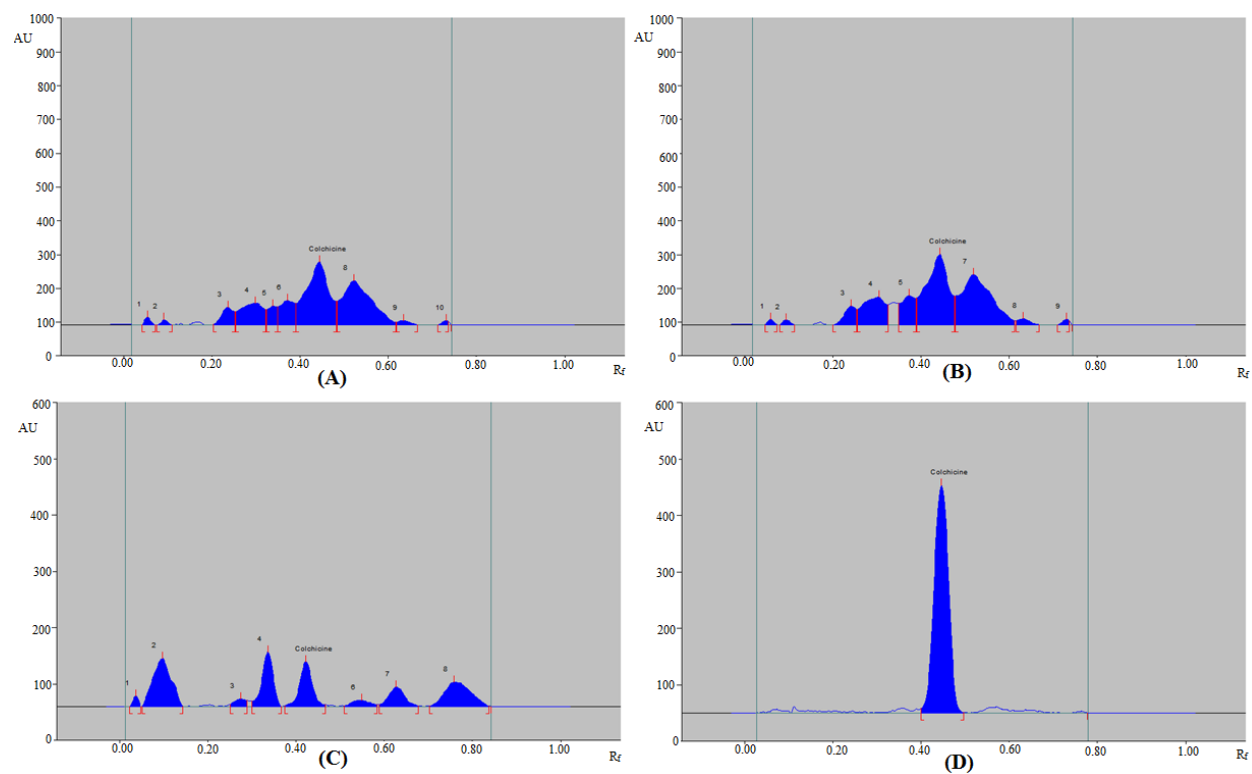

**Figure S1.** Representative chromatograms of CLH in (A) Egyptian seed extract, (B) Indian seed extract, (C) Unani formulation, and (D) allopathic formulation obtained using regular normal-phase HPTLC approach.

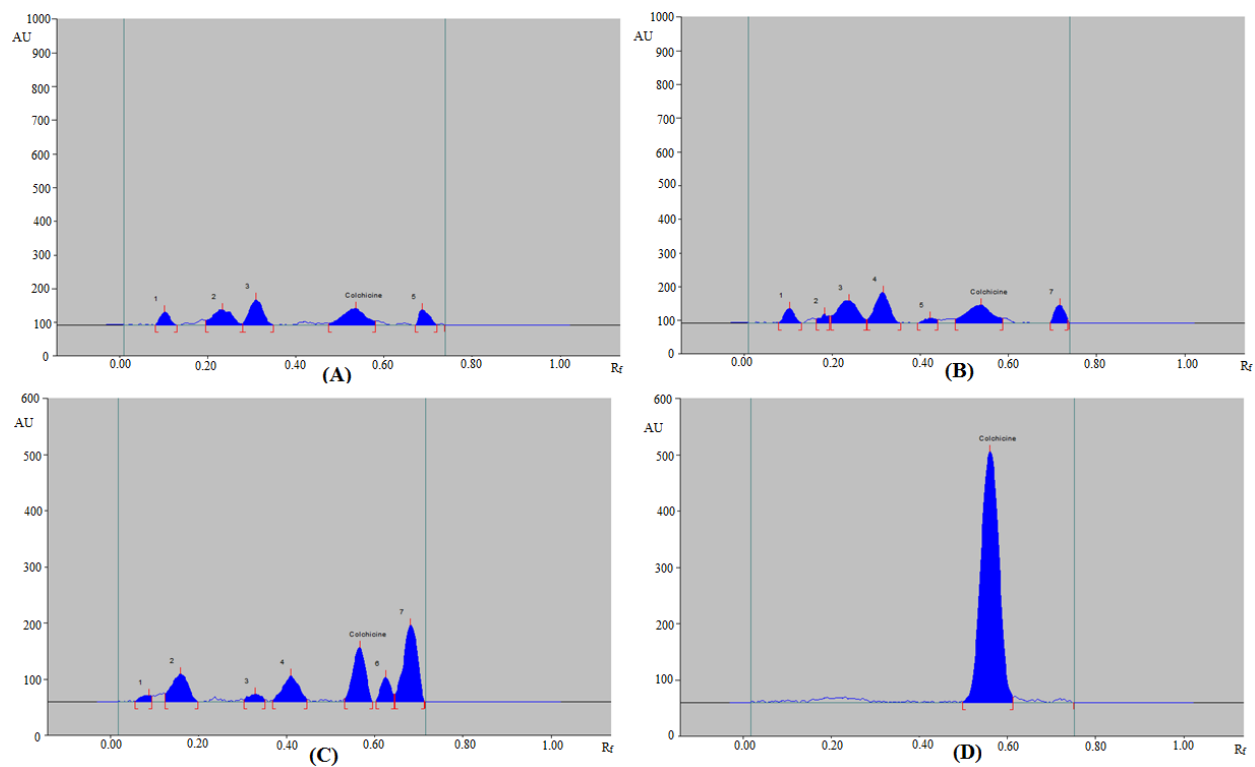

**Figure S2.** Representative chromatograms of CLH in (A) Egyptian seed extract, (B) Indian seed extract, (C) Unani formulation, and (D) allopathic formulation obtained using greener reversed-phase HPTLC approach.

**Table S1.** Application of the regular normal-phase HPTLC and the greener reversed-phase HPTLC approaches in the determination of CLH in methanolic extracts of Egyptian and Indian *C. autumnale* seeds, allopathic formulation, and Unani formulation produced by traditional and ultrasonication procedures (mean  $\pm$  SD; n = 3).

| Samples                        | Traditional extraction                           | Ultrasonication-based extraction |
|--------------------------------|--------------------------------------------------|----------------------------------|
|                                | Amount of CLH (% w/w) using normal-phase HPTLC   |                                  |
| <i>C. autumnale</i> (Egyptian) | 1.74 $\pm$ 0.09                                  | 1.89 $\pm$ 0.10                  |
| <i>C. autumnale</i> (Indian)   | 2.39 $\pm$ 0.11                                  | 2.55 $\pm$ 0.13                  |
| Allopathic formulation         | 12.45 $\pm$ 0.84                                 | 12.61 $\pm$ 0.91                 |
| Unani formulation              | 0.48 $\pm$ 0.01                                  | 0.55 $\pm$ 0.02                  |
|                                | Amount of CLH (% w/w) using reversed-phase HPTLC |                                  |
| <i>C. autumnale</i> (Egyptian) | 2.34 $\pm$ 0.12                                  | 2.61 $\pm$ 0.13                  |
| <i>C. autumnale</i> (Indian)   | 2.90 $\pm$ 0.14                                  | 3.19 $\pm$ 0.16                  |
| Allopathic formulation         | 13.27 $\pm$ 0.92                                 | 15.11 $\pm$ 0.97                 |
| Unani formulation              | 1.37 $\pm$ 0.04                                  | 1.58 $\pm$ 0.05                  |
